# Supplementary material for: A simple and universal headspace GC-FID method for accurate quantitation of volatile amines in pharmaceuticals
Source: Royal Society of Chemistry journal article supplement (doi:10.1039/d3ay00956d), 2023-01-01

1  
2  
3  
4  
5  
6  
7  
8  
9  
10  
11  
12  
13  
14  
15  
16  
17  
18  
19  
20  
21  
22  
23  
24

**Supplemental Information**

**Table S1** Common names, abbreviations, and structures of volatile amines, APIs, and passivation reagent evaluated.

| Category       | Name (Abbreviation)                       | Structure                                                                             |
|----------------|-------------------------------------------|---------------------------------------------------------------------------------------|
| Volatile amine | Methylamine (MA)*                         | 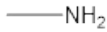   |
|                | Dimethylamine (DMA)                       |    |
|                | <i>t</i> -Butylamine (TBA)                |    |
|                | Diethylamine (DEA)                        |     |
|                | Butylamine (BA)                           |     |
|                | Diisopropylamine (DIPA)                   |     |
|                | Pyrrolidine (PYR)                         |    |
|                | Triethylamine (TEA)                       |    |
|                | Pyridine (PY)                             |  |
|                | <i>N</i> -Methylmorpholine (NMM)          |  |
|                | Tetramethylethylenediamine (TMEDA)        |   |
|                | <i>N,N</i> -Diisopropylethylamine (DIPEA) |   |
|                | 2,6-Lutidine (26L)                        |  |
|                | <i>N</i> -methylimidazole (NMI)           |  |

|                                               |                                            |                                                                                     |
|-----------------------------------------------|--------------------------------------------|-------------------------------------------------------------------------------------|
|                                               | 2,2,6,6-tetramethylpiperidine (TMP)        | 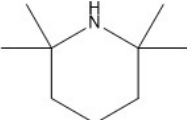  |
| <b>Passivation reagent</b>                    | 1,8-diazabicyclo [5.4.0] undec-7-ene (DBU) |   |
| <b>Active pharmaceutical ingredient (API)</b> | Bictegravir Sodium (BIC)                   |   |
|                                               | Emtricitabine (FTC)                        |   |
|                                               | Ketoprofen® (KET)                          |  |

\*Controlled substance; only used to evaluate separation specificity due to limited availability.

**Table S2** Headspace sampler and GC parameters selected for the analysis of volatile amines.

| <b>GC parameters</b>                |                                                                                                                                                                                                                         |
|-------------------------------------|-------------------------------------------------------------------------------------------------------------------------------------------------------------------------------------------------------------------------|
| Gas Chromatography System           | Agilent 7890                                                                                                                                                                                                            |
| Chromatographic Column              | Rtx-Volatile Amine 30 m x 0.32 mm, 5.0 $\mu$ m                                                                                                                                                                          |
| Carrier Gas                         | Helium                                                                                                                                                                                                                  |
| Carrier Flow                        | Constant Flow at 2.0 mL/min                                                                                                                                                                                             |
| Injection Mode                      | Split 10:1 (EPC)                                                                                                                                                                                                        |
| Inlet Temperature                   | 220 °C                                                                                                                                                                                                                  |
| Oven Temperature Program            | 40 °C initial temperature, hold for 2 minutes<br>Ramp at 8 °C/min to 70 °C, no hold<br>Ramp at 5 °C/min to 100 °C, no hold<br>Ramp at 10 °C/min to 200 °C, no hold<br>Ramp at 30 °C/min to 230 °C, hold for 7.2 minutes |
| Detection Method                    | Flame Ionization Detection                                                                                                                                                                                              |
| Detector Gas Flow Rate              | Fuel (Hydrogen): 40 mL/min                                                                                                                                                                                              |
| Detector Temperature                | 270 °C                                                                                                                                                                                                                  |
| Run Time                            | 30 min                                                                                                                                                                                                                  |
| <b>Headspace Sampler Parameters</b> |                                                                                                                                                                                                                         |
| Oven Temperature                    | 120°C                                                                                                                                                                                                                   |
| Loop Temperature                    | 130 °C                                                                                                                                                                                                                  |
| Transfer Line Temperature           | 180 °C                                                                                                                                                                                                                  |
| GC Cycle Time                       | 37 min                                                                                                                                                                                                                  |
| Vial Equilibration Time             | 10 min                                                                                                                                                                                                                  |
| Vial Pressurization Time            | 0.2 min                                                                                                                                                                                                                 |
| Injection Time                      | 1.0 min                                                                                                                                                                                                                 |
| Vial Pressurization Mode            | Fill to pressure, 20 psi                                                                                                                                                                                                |
| Loop Fill Mode                      | Default                                                                                                                                                                                                                 |
| Vent after Extraction               | Yes                                                                                                                                                                                                                     |
| Vial Size                           | 20 mL                                                                                                                                                                                                                   |
| Shaking Level                       | 9                                                                                                                                                                                                                       |
| Loop Volume                         | 1.0 mL                                                                                                                                                                                                                  |
| Vial Standby Flow                   | 10 L/min                                                                                                                                                                                                                |

**Table S3** Comparison of the recovery of volatile amines from BIC API dissolved in DMAc containing various concentrations of DBU.

| Volatile Amine | Pure DMAc    |         | 0.1% (v/v) DBU/DMAc |         | 5% (v/v) DBU/DMAc |         | 10% (v/v) DBU/DMAc |         |
|----------------|--------------|---------|---------------------|---------|-------------------|---------|--------------------|---------|
|                | Recovery (%) | RSD (%) | Recovery (%)        | RSD (%) | Recovery (%)      | RSD (%) | Recovery (%)       | RSD (%) |
| <b>DMA</b>     | 90.0         | 0.6     | 87.7                | 1.4     | 80.6              | 0.9     | 78.2               | 0.9     |
| <b>TBA</b>     | 99.6         | 0.8     | 96.8                | 0.8     | 94.6              | 1.3     | 97.6               | 0.6     |
| <b>DEA</b>     | 98.2         | 1.0     | 93.4                | 2.0     | 96.1              | 2.4     | 103.4              | 0.9     |
| <b>BA</b>      | 97.4         | 0.8     | 89.6                | 0.8     | 83.5              | 2.2     | 82.8               | 1.4     |
| <b>DIPA</b>    | 106.9        | 1.0     | 103.8               | 1.1     | 102.8             | 1.8     | 109.5              | 0.7     |
| <b>PYR</b>     | 98.2         | 1.0     | 89.6                | 0.8     | 80.8              | 0.8     | 75.4               | 0.4     |
| <b>TEA</b>     | 108.9        | 1.3     | 104.2               | 1.2     | 100.5             | 1.1     | 103.3              | 0.6     |
| <b>PY</b>      | 112.5        | 0.8     | 101.2               | 1.6     | 95.5              | 3.1     | 101.8              | 0.9     |
| <b>NMM</b>     | 110.7        | 0.9     | 100.5               | 1.3     | 96.4              | 2.5     | 100.9              | 0.4     |
| <b>TMEDA</b>   | 103.5        | 1.2     | 96.8                | 1.2     | 101.2             | 1.8     | 113.4              | 0.5     |
| <b>DIPEA</b>   | 108.0        | 0.6     | 99.1                | 0.9     | 97.7              | 0.4     | 97.7               | 1.9     |
| <b>26L</b>     | 110.6        | 3.8     | 95.5                | 3.5     | 90.7              | 4.8     | 98.4               | 0.8     |
| <b>NMI</b>     | 93.4         | 5.8     | 81.2                | 8.2     | 65.9              | 6.7     | 72.7               | 5.8     |
| <b>TMP</b>     | 115.9        | 2.1     | 100.9               | 1.5     | 99.6              | 3.1     | 104.6              | 0.8     |

**Table S4** Comparison of the recovery of volatile amines from FTC API dissolved in DMAc containing various concentrations of DBU.

| Volatile Amine | Pure DMAc    |         | 0.1% (v/v) DBU/DMAc |         | 5% (v/v) DBU/DMAc |         | 10% (v/v) DBU/DMAc |         |
|----------------|--------------|---------|---------------------|---------|-------------------|---------|--------------------|---------|
|                | Recovery (%) | RSD (%) | Recovery (%)        | RSD (%) | Recovery (%)      | RSD (%) | Recovery (%)       | RSD (%) |
| <b>DMA</b>     | 79.5         | 1.6     | 58.2                | 0.7     | 62.6              | 1.6     | 55.3               | 0.6     |
| <b>TBA</b>     | 83.8         | 1.9     | 88.6                | 0.8     | 90.8              | 1.8     | 92.9               | 0.6     |
| <b>DEA</b>     | 94.0         | 1.3     | 91.8                | 0.9     | 94.5              | 1.7     | 92.0               | 0.7     |
| <b>BA</b>      | 40.5         | 5.1     | 27.0                | 1.8     | 36.6              | 1.9     | 33.1               | 1.0     |
| <b>DIPA</b>    | 118.2        | 1.8     | 118.9               | 0.4     | 111.5             | 2.3     | 113.7              | 0.5     |
| <b>PYR</b>     | 45.9         | 2.8     | 23.2                | 1.6     | 23.6              | 1.5     | 18.6               | 1.5     |
| <b>TEA</b>     | 113.2        | 1.8     | 104.8               | 1.0     | 105.7             | 2.8     | 109.0              | 0.6     |
| <b>PY</b>      | 117.0        | 1.2     | 101.8               | 1.9     | 103.8             | 3.8     | 100.7              | 1.0     |
| <b>NMM</b>     | 114.7        | 1.7     | 97.2                | 1.9     | 95.6              | 2.7     | 99.7               | 0.4     |
| <b>TMDEA</b>   | 104.3        | 1.3     | 103.8               | 1.6     | 109.8             | 0.9     | 97.4               | 0.9     |
| <b>DIPEA</b>   | 117.5        | 2.9     | 100.7               | 1.1     | 102.8             | 0.6     | 105.9              | 1.6     |
| <b>26L</b>     | 117.1        | 1.7     | 94.1                | 2.9     | 92.0              | 4.4     | 97.0               | 3.4     |
| <b>NMI</b>     | 105.9        | 1.7     | 85.2                | 8.6     | 69.0              | 3.3     | 76.7               | 2.9     |
| <b>TMP</b>     | 116.4        | 1.9     | 106.0               | 2.3     | 106.5             | 2.9     | 112.8              | 0.7     |

**Table S5** Precision of LOQ injections (n=6) following system passivation with and without 5% (v/v) DBU/DMAc.

| <b>Analyte</b> | <b>System passivation<br/>using DMAc (%RSD)</b> | <b>System passivation<br/>using 5% (v/v) DBU/DMAc (%RSD)</b> |
|----------------|-------------------------------------------------|--------------------------------------------------------------|
| <b>DMA</b>     | 0.9                                             | 0.8                                                          |
| <b>TBA</b>     | 1.3                                             | 0.5                                                          |
| <b>DEA</b>     | 4.6                                             | 0.8                                                          |
| <b>BA</b>      | 2.8                                             | 1.0                                                          |
| <b>DIPA</b>    | 1.9                                             | 1.0                                                          |
| <b>PYR</b>     | 5.3                                             | 1.3                                                          |
| <b>TEA</b>     | 2.3                                             | 0.9                                                          |
| <b>PY</b>      | 3.6                                             | 1.8                                                          |
| <b>NMM</b>     | 2.5                                             | 1.5                                                          |
| <b>TMDEA</b>   | 2.8                                             | 1.2                                                          |
| <b>DIPEA</b>   | 2.1                                             | 0.8                                                          |
| <b>26L</b>     | 4.4                                             | 1.2                                                          |
| <b>NMI</b>     | 11.2                                            | 5.9                                                          |
| <b>TMP</b>     | 3.1                                             | 1.3                                                          |

**Table S6** Specificity and resolution of volatile amines in the presence of common residual solvents used in API manufacturing.

| Analyte                     | 5% (v/v) DBU/DMAc    |                                | 5% (v/v) DBU/NMP     |                                | 5% (v/v) DBU/DMAc | 5% (v/v) DBU/NMP |
|-----------------------------|----------------------|--------------------------------|----------------------|--------------------------------|-------------------|------------------|
|                             | Retention Time (min) | Relative retention time to DBU | Retention Time (min) | Relative retention time to DBU | USP Resolution    |                  |
| MA                          | 2.35                 | 0.09                           | 2.63                 | 0.10                           | NA                | NA               |
| MeOH                        | 2.66                 | 0.10                           | 2.95                 | 0.11                           | 3.0               | 3.4              |
| DMA                         | 3.12                 | 0.12                           | 3.47                 | 0.13                           | 4.2               | 5.1              |
| EtOH                        | 3.72                 | 0.14                           | 4.09                 | 0.15                           | 5.3               | 5.9              |
| ACN                         | 4.05                 | 0.16                           | 4.45                 | 0.17                           | 2.8               | 3.4              |
| Acetone                     | 4.37                 | 0.17                           | 4.79                 | 0.18                           | 2.8               | 3.1              |
| IPA                         | 4.59                 | 0.18                           | 5.02                 | 0.19                           | 1.8               | 1.9              |
| TBA                         | 5.10                 | 0.20                           | 5.56                 | 0.21                           | 3.4               | 4.0              |
| <i>t</i> -Butanol           | 5.28                 | 0.20                           | 5.78                 | 0.22                           | 1.2               | 1.3              |
| DCM                         | 5.47                 | 0.21                           | 5.95                 | 0.22                           | 1.4               | 1.8              |
| DEA/MTBE                    | 6.604/6.689          | 0.23/0.26                      | 7.15                 | 0.27                           | 6.7               | 8.0              |
| MEK                         | 7.01                 | 0.27                           | 7.56                 | 0.28                           | -                 | 2.6              |
| 2-Butanol                   | 7.30                 | 0.28                           | 7.85                 | 0.29                           | 2.1               | 2.3              |
| Diisopropyl Ether/<br>EtOAc | 7.66                 | 0.29                           | 8.23                 | 0.31                           | 1.6               | 2.2              |
| <i>n</i> -Hexane            | 7.76                 | 0.30                           | 8.35                 | 0.31                           | 0.4               | 0.6              |
| THF                         | 8.31                 | 0.32                           | 8.93                 | 0.33                           | 3.5               | 4.0              |
| BA                          | 8.47                 | 0.33                           | 9.10                 | 0.34                           | 1.2               | 1.3              |
| IPAc/<br><i>n</i> -Butanol  | 9.22                 | 0.35                           | 9.85                 | 0.37                           | 5.0               | 5.4              |
| DIPA                        | 9.52                 | 0.37                           | 10.19                | 0.38                           | -                 | 1.8              |
| Benzene                     | 9.60                 | 0.37                           | 10.19                | 0.38                           | -                 | -                |
| 2-Methyl THF                | 9.75                 | 0.37                           | 10.43                | 0.39                           | -                 | 1.3              |
| PYR                         | 10.09                | 0.39                           | 10.80                | 0.40                           | 2.3               | 2.7              |
| TEA                         | 10.47                | 0.40                           | 11.15                | 0.42                           | 2.3               | 2.3              |
| 1,4-Dioxane                 | 10.76                | 0.41                           | 11.46                | 0.43                           | 1.8               | 1.9              |
| <i>n</i> -Heptane           | 11.12                | 0.43                           | 11.82                | 0.44                           | 2.5               | 2.5              |
| MIBK                        | 11.89                | 0.46                           | 12.58                | 0.47                           | 4.9               | 5.4              |
| PY                          | 12.02                | 0.46                           | 12.72                | 0.47                           | 0.8               | 1.2              |
| DMF                         | 12.62                | 0.48                           | 13.27                | 0.49                           | 3.9               | 4.8              |
| Toluene                     | 13.27                | 0.51                           | 13.93                | 0.52                           | 4.5               | 5.6              |
| NMM                         | 13.67                | 0.53                           | 14.32                | 0.53                           | 3.1               | 3.2              |
| TMEDA                       | 14.50                | 0.56                           | 15.12                | 0.56                           | 6.3               | 6.3              |
| DIPEA                       | 14.92                | 0.57                           | 15.54                | 0.58                           | 3.0               | 3.1              |
| 26L*                        | 16.26                | 0.62                           | —                    | —                              | 1.3               | N/A              |
| NMI                         | 16.69                | 0.64                           | 17.30                | 0.64                           | 4.4               | 10.6             |
| TMP                         | 17.95                | 0.69                           | 18.52                | 0.69                           | 11.1              | 7.9              |
| DBU                         | 26.02                | 1.00                           | 26.84                | 1.00                           | -                 | -                |

\* 26L is not evaluated for specificity in 5% (v/v) DBU/NMP due to the presence of interfering artifact peak from stemming from NMP.



**Table S7** Analytical validation results for the analysis of volatile amines in 5% (v/v) DBU/DMAc or 5% (v/v) DBU/NMP

| Analyte      | LOD <sup>†</sup><br>(mg/mL) | LOQ <sup>‡</sup><br>(mg/mL) | Diluent: 5 % (v/v) DBU/DMAc |                               |                                                 | Diluent: 5% (v/v) DBU/NMP  |                               |                                                 |
|--------------|-----------------------------|-----------------------------|-----------------------------|-------------------------------|-------------------------------------------------|----------------------------|-------------------------------|-------------------------------------------------|
|              |                             |                             | LOQ<br>RSD<br>(%)<br>(n=6)  | Linearity<br>Range<br>(mg/mL) | Correlation<br>Coefficient<br>(R <sup>2</sup> ) | LOQ<br>RSD<br>(%)<br>(n=6) | Linearity<br>Range<br>(mg/mL) | Correlation<br>Coefficient<br>(R <sup>2</sup> ) |
| <b>DMA</b>   | 0.025                       | 0.05                        | 0.8                         | 0.05-2.5                      | 1.000                                           | 1.7                        | 0.05-2.5                      | 1.000                                           |
| <b>TBA</b>   | 0.005                       | 0.01                        | 0.8                         | 0.01-2.5                      | 1.000                                           | 0.7                        | 0.01-2.5                      | 1.000                                           |
| <b>DEA</b>   | 0.0025                      | 0.005                       | 1.2                         | 0.005-2.5                     | 1.000                                           | 1.5                        | 0.005-2.5                     | 1.000                                           |
| <b>BA</b>    | 0.005                       | 0.01                        | 0.3                         | 0.01-2.5                      | 1.000                                           | 0.7                        | 0.01-2.5                      | 1.000                                           |
| <b>DIPA</b>  | 0.005                       | 0.01                        | 0.6                         | 0.01-2.5                      | 1.000                                           | 1.2                        | 0.01-2.5                      | 1.000                                           |
| <b>PYR</b>   | 0.025                       | 0.05                        | 0.4                         | 0.05-2.5                      | 1.000                                           | 0.6                        | 0.05-2.5                      | 1.000                                           |
| <b>TEA</b>   | 0.005                       | 0.01                        | 0.6                         | 0.01-2.5                      | 0.999                                           | 1.2                        | 0.01-2.5                      | 1.000                                           |
| <b>PY</b>    | 0.005                       | 0.01                        | 0.7                         | 0.01-2.5                      | 1.000                                           | 0.8                        | 0.01-2.5                      | 1.000                                           |
| <b>NMM</b>   | 0.005                       | 0.01                        | 0.3                         | 0.01-2.5                      | 1.000                                           | 0.9                        | 0.01-2.5                      | 1.000                                           |
| <b>TMEDA</b> | 0.005                       | 0.01                        | 0.3                         | 0.01-2.5                      | 1.000                                           | 1.4                        | 0.01-2.5                      | 1.000                                           |
| <b>DIPEA</b> | 0.005                       | 0.01                        | 0.3                         | 0.01-2.5                      | 0.999                                           | 1.7                        | 0.01-2.5                      | 1.000                                           |
| <b>26L*</b>  | 0.005                       | 0.01                        | 3.0                         | 0.01-2.5                      | 1.000                                           | N/A                        | N/A                           | N/A                                             |
| <b>NMI</b>   | 0.025                       | 0.05                        | 2.2                         | 0.05-2.5                      | 1.000                                           | 3.1                        | 0.05-2.5                      | 0.999                                           |
| <b>TMP</b>   | 0.005                       | 0.01                        | 0.6                         | 0.01-2.5                      | 1.000                                           | 1.7                        | 0.01-2.5                      | 1.000                                           |

\* 26L is not evaluated for specificity in 5% (v/v) DBU/NMP due to the presence of interfering artifact peak stemming from NMP.

<sup>†</sup> LOD is inferred as 0.5x LOQ.

<sup>‡</sup> LOQ is established based on a minimum S/N ratio of 10x.

**Table S8** Solution stability results for the analysis of volatile amines in 5% (v/v) DBU/DMAc or 5% (v/v) DBU/NMP

| Analyte | Recovery Range (%)                                                                                                                                                          |                    |                                                                                                                                                                                      |                    |
|---------|-----------------------------------------------------------------------------------------------------------------------------------------------------------------------------|--------------------|--------------------------------------------------------------------------------------------------------------------------------------------------------------------------------------|--------------------|
|         | Working Standard Solution:<br>The working standard solution is stable for up to 8 days in 5% (v/v) DBU/DMAc and 7 days in 5% (v/v) DBU/NMP when stored at room temperature. |                    | LOQ Solution:<br>The LOQ solution is stable up to 6 days for DMA and 7 days for all other volatile amines in 5% (v/v) DBU/DMAc and 5% (v/v) DBU/NMP when stored at room temperature. |                    |
|         | 5 % (v/v) DBU/DMAc*                                                                                                                                                         | 5% (v/v) DBU/NMP** | 5 % (v/v) DBU/DMAc***                                                                                                                                                                | 5% (v/v) DBU/NMP** |
| DMA     | 89 - 100                                                                                                                                                                    | 96-101             | 71 -91                                                                                                                                                                               | 85-92              |
| TBA     | 96 -102                                                                                                                                                                     | 97-99              | 95-98                                                                                                                                                                                | 95-98              |
| DEA     | 96 - 103                                                                                                                                                                    | 97-99              | 100-104                                                                                                                                                                              | 96-99              |
| BA      | 96 - 100                                                                                                                                                                    | 96-98              | 89-96                                                                                                                                                                                | 91-94              |
| DIPA    | 97 - 102                                                                                                                                                                    | 97-99              | 100-103                                                                                                                                                                              | 103-107            |
| PYR     | 91- 98                                                                                                                                                                      | 96-102             | 82-94                                                                                                                                                                                | 83-90              |
| TEA     | 96 - 102                                                                                                                                                                    | 97-99              | 98-101                                                                                                                                                                               | 96-100             |
| PY      | 98 - 103                                                                                                                                                                    | 96-98              | 97-103                                                                                                                                                                               | 99-102             |
| NMM     | 98 - 102                                                                                                                                                                    | 97-98              | 97-104                                                                                                                                                                               | 97-100             |
| TMEDA   | 97 - 101                                                                                                                                                                    | 97-98              | 97-104                                                                                                                                                                               | 95-99              |
| DIPEA   | 96 - 101                                                                                                                                                                    | 96-98              | 102-112                                                                                                                                                                              | 93-97              |
| 26L†    | 98 - 102                                                                                                                                                                    | NA                 | 91-99                                                                                                                                                                                | NA                 |
| NMI     | 108- 113                                                                                                                                                                    | 95-99              | 85-117                                                                                                                                                                               | 81-85              |
| TMP     | 97 - 100                                                                                                                                                                    | 95-98              | 95-105                                                                                                                                                                               | 98-101             |

\* Recovery ranges obtained by performing recovery studies of volatile amine standard at T = 0, 6, and 8 days.

\*\* Recovery ranges obtained by performing recovery studies of volatile amine standard at T = 0, 2, 5, and 7 days.

\*\*\* Recovery ranges obtained by performing recovery studies of volatile amine standard at T = 0, 2, 6, and 8 days.

† 26L is not evaluated for specificity in 5% (v/v) DBU/NMP due to the presence of interfering artifact peak stemming from NMP.

**Figure S1** Chromatogram of 0.1 mg/mL 14 amines in 5% (v/v) DBU/DMAc: (1) DMA, (2) TBA, (3) DEA, (4) BA, (5) DIPA, (6) PYR, (7) TEA, (8) PY, (9) NMM, (10) TMEDA, (11) DIPEA, (12) DMAc, (13) 26L, (14) NMI, (15) TMP, (16) DBU

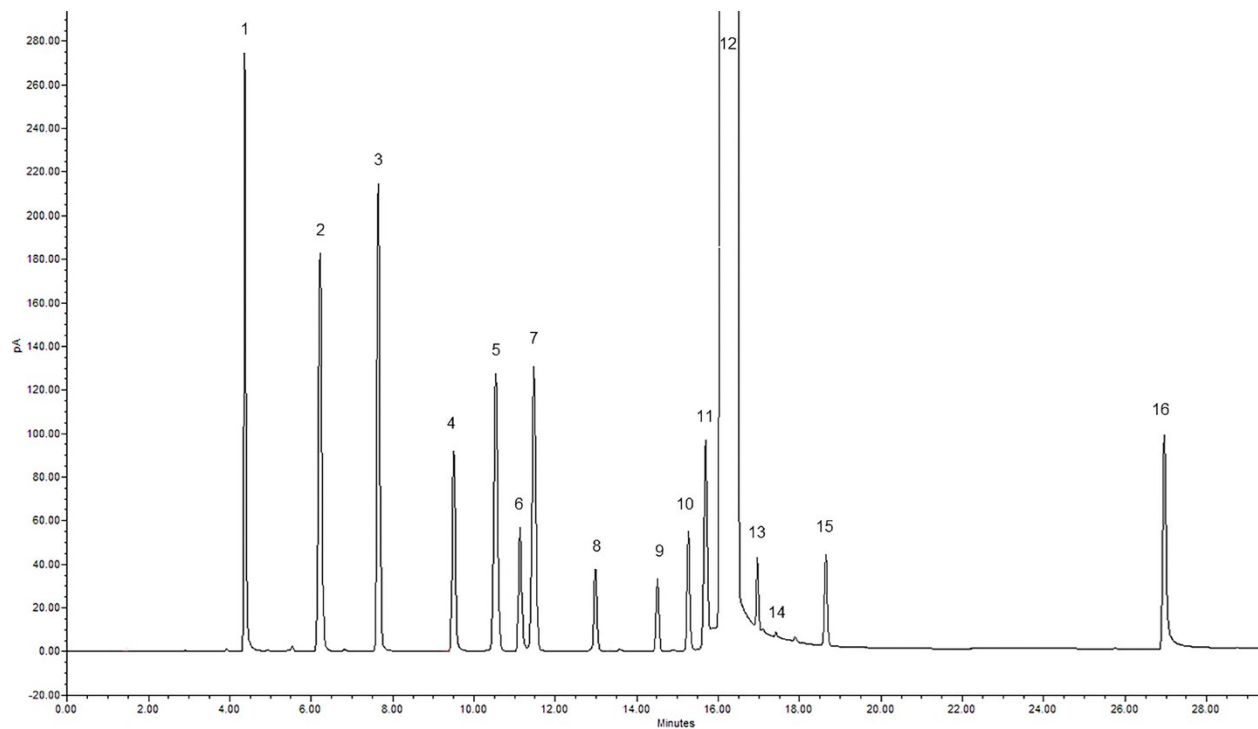

**Figure S2** Comparison of the change in peak area response of LOQ solutions prepared in different DBU/DMAc diluent systems. (■) Pure DMAc, (■) 0.1% (v/v) DBU/DMAc, (■) 5% (v/v) DBU/DMAc, and (■) 10% (v/v) DBU/DMAc. \*DMA peak area scaled down by 3x due to high detector response.

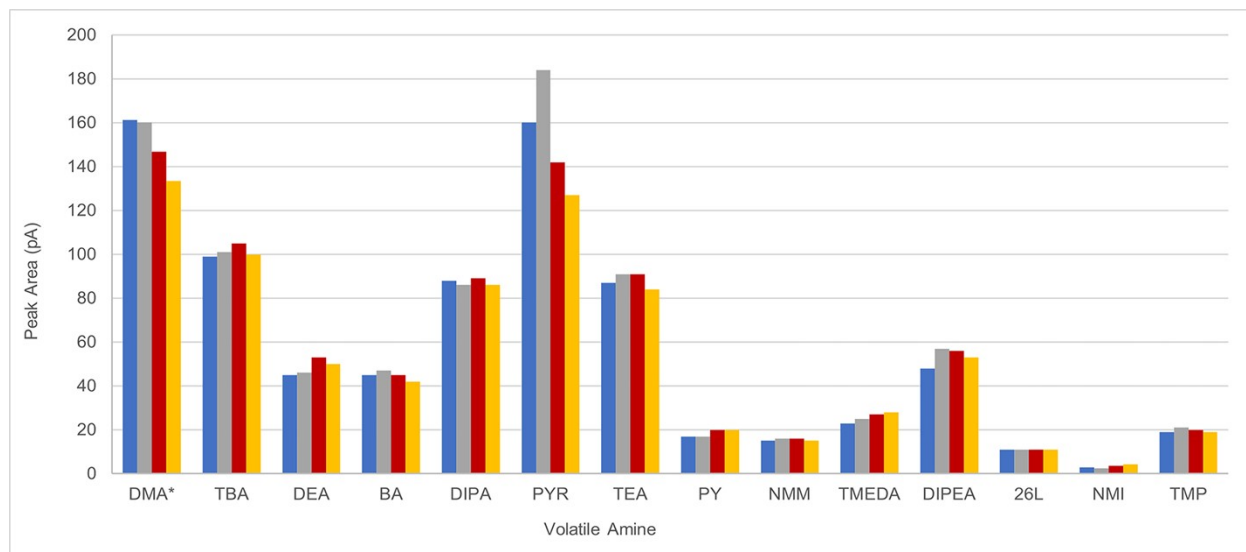

**Figure S3** Chromatogram overlay of (A) 0.01N NaOH in DMAc (B) 0.5N NaOH in DMAc (C) 0.01 mg/mL 15 amines in 0.5N NaOH in DMAc (D) 0.1 mg/mL 15 amines in 0.5N NaOH in DMAc: (1) MA (2) DMA, (3) TBA, (4) DEA, (5) BA, (6) DIPA, (7) PYR, (8) TEA, (9) PY, (10) NMM, (11) TMEDA, (12) DIPEA, (13) DMAc, (14) 26L, (15) NMI, (16) TMP.

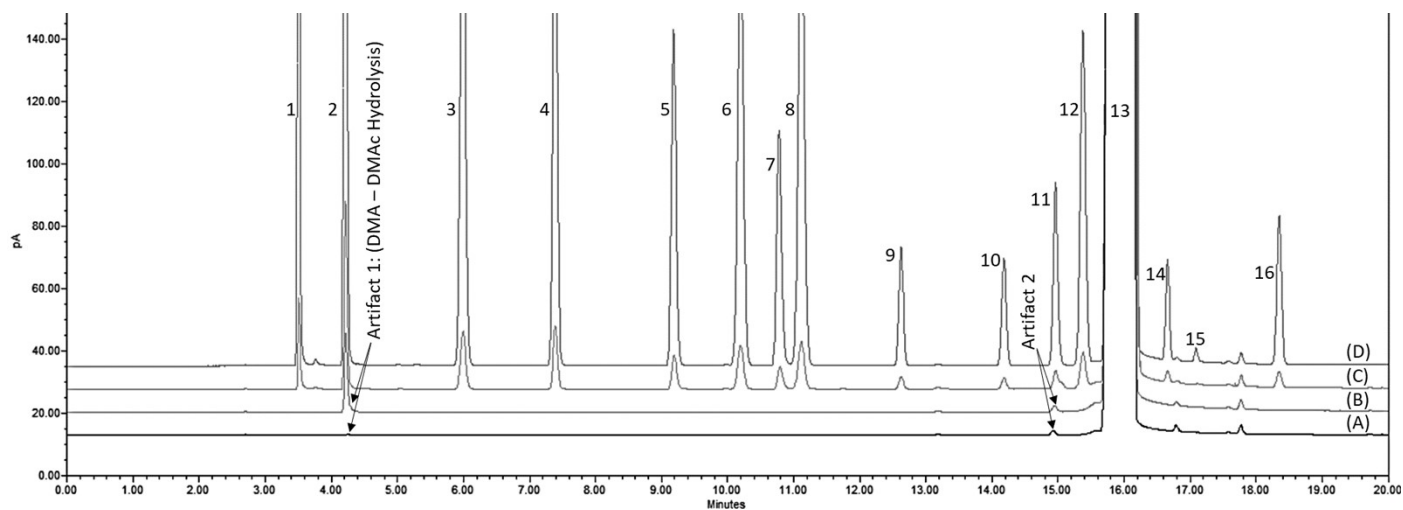

**Figure S4** Chromatogram of a 0.1 mg/mL composite solution containing volatile amines and common residual solvents in 5% (v/v) DBU/DMAc. (1) MA, (2) MeOH, (3) DMA, (4) EtOH, (5) ACN, (6) Acetone, (7) IPA, (8) TBA (9) *t*-Butanol, (10) DCM, (11) DEA, (12) MTBE, (13) MEK, (14) 2-Butanol, (15) Diisopropyl ether, (16) EtOAc, (17) *n*-Hexane, (18) THF, (19) BA, (20) IPAc, (21) *n*-Butanol, (22) DIPA, (23) Benzene, (24) 2-Methyltetrahydrofuran, (25) PYR, (26) TEA, (27) 1,4-Dioxane, (28) *n*-Heptane, (29) MIBK, (30) PY, (31) DMF, (32) Toluene, (33) NMM, (34) TMEDA, (35) DIPEA, (36) DMAc, (37) 26L, (38) NMI, (39) TMP, (40) DBU.

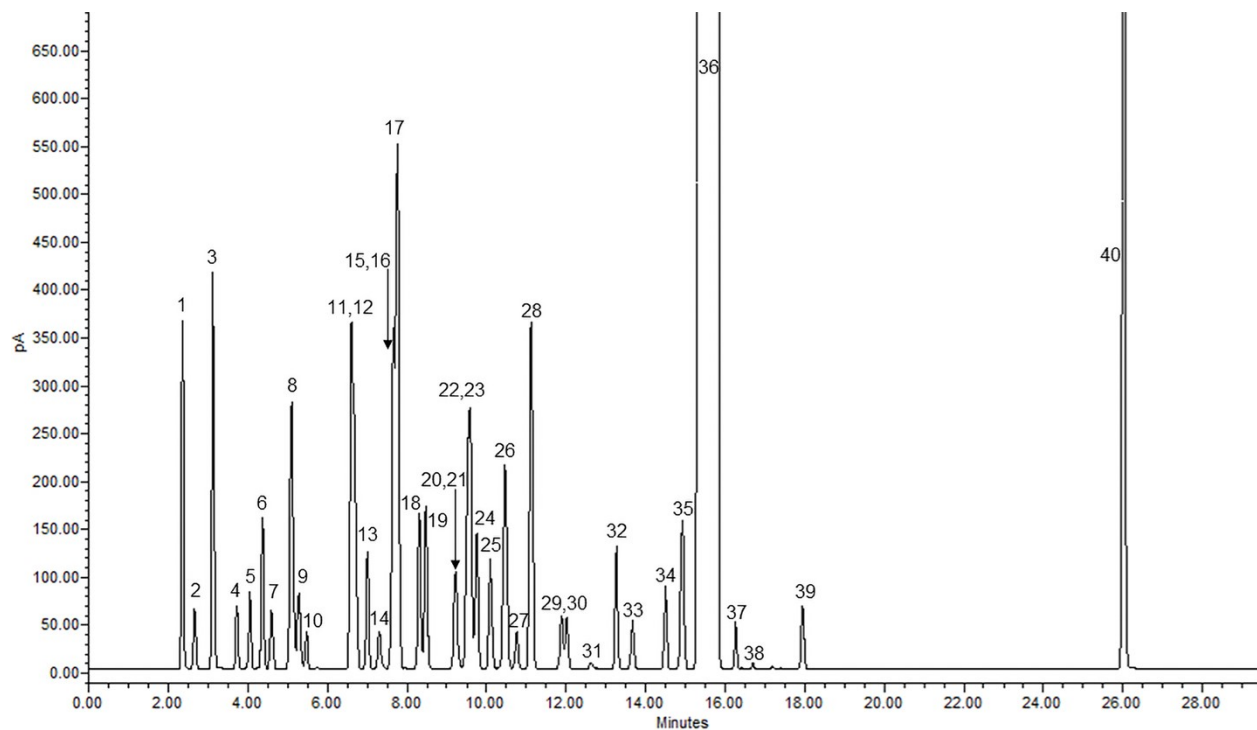

**Figure S5** Chromatogram of a 0.1 mg/mL composite solution containing volatile amines and common residual solvents in 5% (v/v) DBU/NMP. (1) MA, (2) MeOH, (3) DMA, (4) EtOH, (5) ACN, (6) Acetone, (7) IPA, (8) TBA, (9) *t*-Butanol, (10) DCM, (11) DEA, (12) MTBE, (13) MEK, (14) 2-Butanol, (15) Diisopropyl Ether, (16) EtOAc, (17) *n*-Hexane, (18) THF, (19) BA, (20) IPAc, (21) *n*-Butanol, (22) DIPA, (23) Benzene, (24) 2-Methyltetrahydrofuran, (25) PYR, (26) TEA, (27) 1,4-Dioxane, (28) *n*-Heptane, (29) MIBK, (30) PY, (31) DMF, (32) Toluene, (33) NMM, (34) TMEDA, (35) DIPEA, (36) NMI, (37) TMP, (38) NMP, (39) DBU.

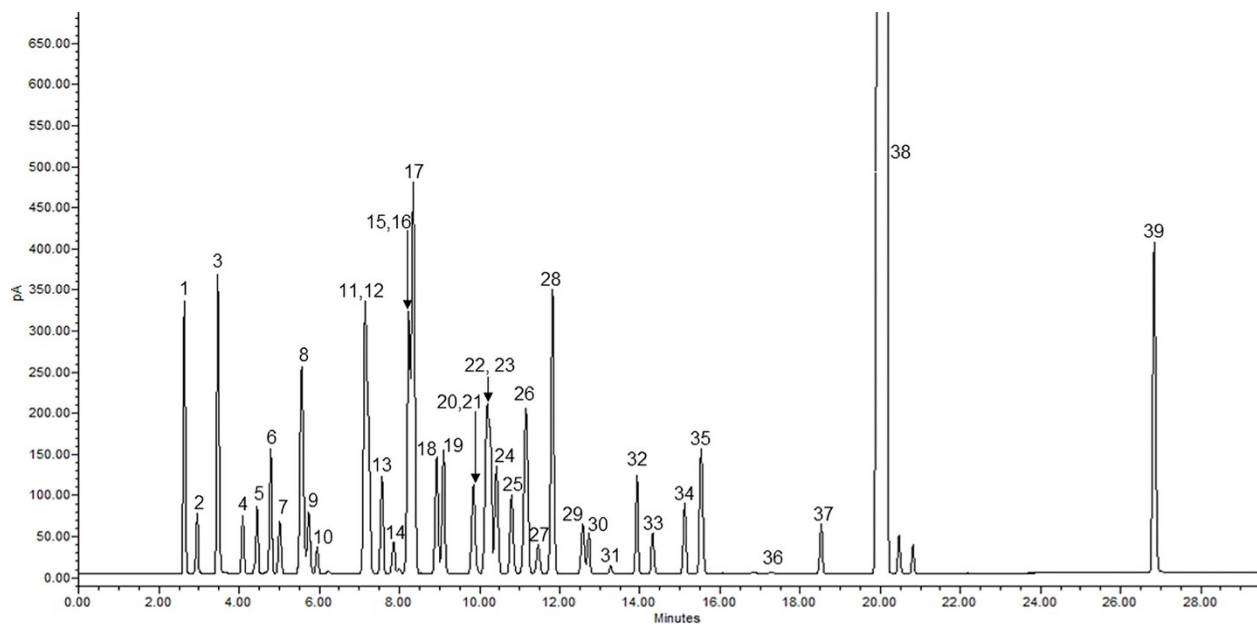

Supplement: d3ay00956d1.pdf [file d3ay00956d1.pdf]
